# Supplementary material for: Effect of physical inactivity and tobacco use on mortality and morbidity in revascularized patients with peripheral arterial disease: A nationwide cohort study
Source: bioRxiv or medRxiv preprint supplement (doi:10.1101/2021.05.12.21257135), 2021-05-15

eFigure 1. Study design.

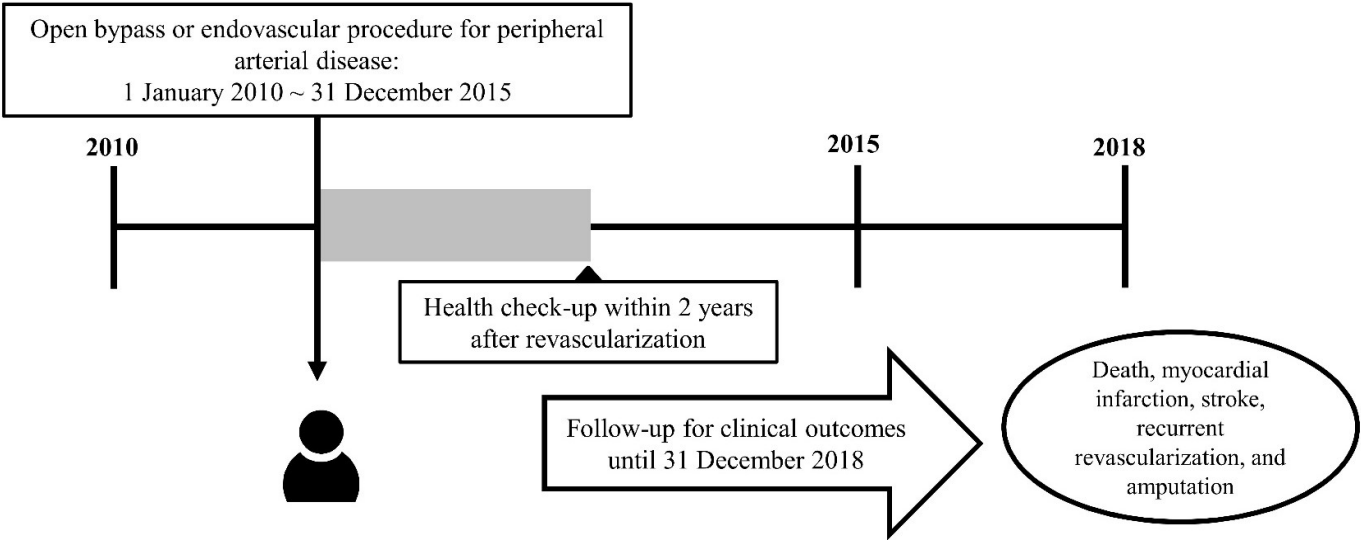

Supplement: Supplementary file [file media-1.pdf]
