# Supplementary material for: Effect of physical inactivity and tobacco use on mortality and morbidity in revascularized patients with peripheral arterial disease: A nationwide cohort study
Source: bioRxiv or medRxiv preprint supplement (doi:10.1101/2021.05.12.21257135), 2021-05-15
Supplement: Supplementary file [file media-4.pdf]

**eFigure 4.** Physical activity categorization.

|                                                                                                                                                                                                                                                                                                                                                                                                                                                                                                                                                                                                        |
|--------------------------------------------------------------------------------------------------------------------------------------------------------------------------------------------------------------------------------------------------------------------------------------------------------------------------------------------------------------------------------------------------------------------------------------------------------------------------------------------------------------------------------------------------------------------------------------------------------|
| <p><b>Active</b></p> <ul style="list-style-type: none"><li>1) At least 3 days of vigorous PA</li><li>2) At least 5 days of moderate PA</li><li>3) 4 days of moderate and 1 to 2 days of vigorous PA</li><li>4) 3 days of moderate and 2 days of vigorous PA</li><li>5) At least 5 days of walking</li><li>6) 4 days of walking and 1 to 4 days of moderate or vigorous PA</li><li>7) 3 days of walking and 2 to 4 days of moderate or vigorous PA</li><li>8) 2 days of walking and 3 to 4 days of moderate or vigorous PA</li><li>9) 1 days of walking and 4 days of moderate or vigorous PA</li></ul> |
| <hr style="border-top: 1px dashed black;"/> <p><b>Inactive</b></p> <p>Others</p>                                                                                                                                                                                                                                                                                                                                                                                                                                                                                                                       |
