# Supplementary material for: Effect of physical inactivity and tobacco use on mortality and morbidity in revascularized patients with peripheral arterial disease: A nationwide cohort study
Source: bioRxiv or medRxiv preprint supplement (doi:10.1101/2021.05.12.21257135), 2021-05-15

**eFigure 6.** Kaplan-Meier curves for PA-related energy expenditure.

(A) mortality, (B) major adverse outcome, and (C) MALE.

PA: physical activity; MALE: major adverse limb event.

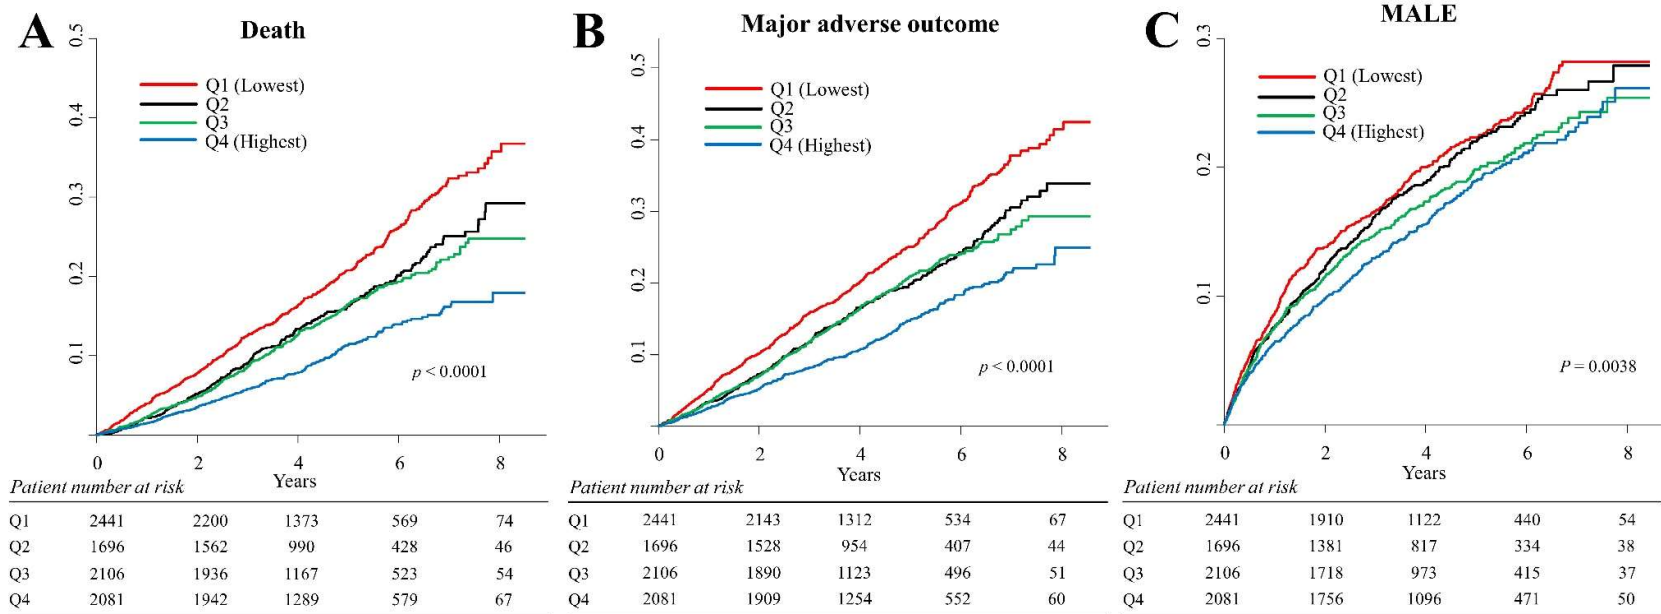

Supplement: Supplementary file [file media-6.pdf]
