# Supplementary material for: Effect of physical inactivity and tobacco use on mortality and morbidity in revascularized patients with peripheral arterial disease: A nationwide cohort study
Source: bioRxiv or medRxiv preprint supplement (doi:10.1101/2021.05.12.21257135), 2021-05-15
Supplement: Supplementary file [file media-7.pdf]

**eFigure 7.** Kaplan-Meier curves for tobacco use (further classification).

(A) mortality, (B) major adverse outcome, and (C) MALE.

MALE: major adverse limb event.

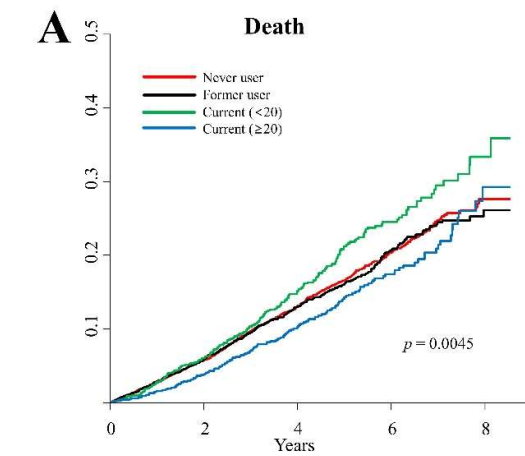

| <i>Patient number at risk</i> |      |      |      |     |    |
|-------------------------------|------|------|------|-----|----|
|                               | 0    | 2    | 4    | 6   | 8  |
| Never user                    | 3380 | 3097 | 1937 | 837 | 91 |
| Former user                   | 2751 | 2516 | 1595 | 687 | 85 |
| Current (<20)                 | 1130 | 1027 | 621  | 277 | 31 |
| Current (≥20)                 | 1063 | 1000 | 666  | 298 | 34 |

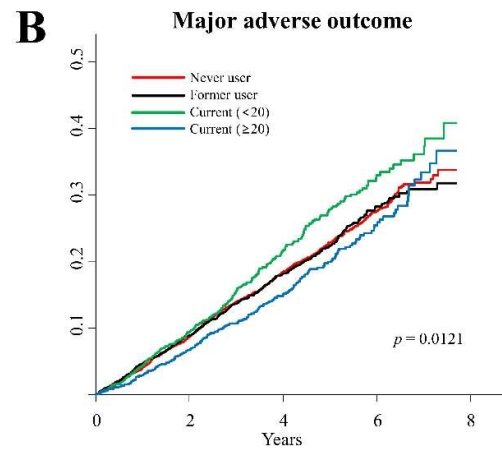

| <i>Patient number at risk</i> |      |      |      |     |    |
|-------------------------------|------|------|------|-----|----|
|                               | 0    | 2    | 4    | 6   | 8  |
| Never user                    | 3380 | 3033 | 1870 | 794 | 82 |
| Former user                   | 2751 | 2456 | 1535 | 654 | 78 |
| Current (<20)                 | 1130 | 805  | 597  | 259 | 31 |
| Current (≥20)                 | 1063 | 811  | 641  | 282 | 31 |

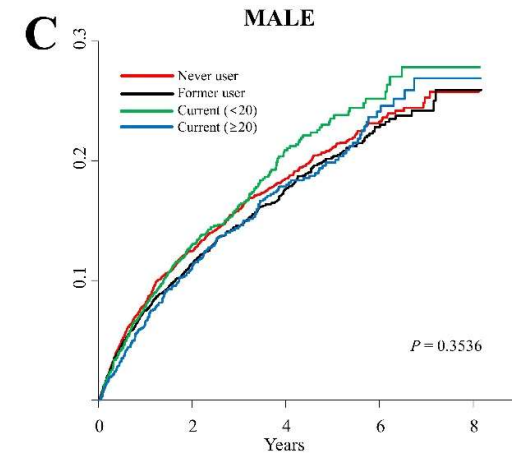

| <i>Patient number at risk</i> |      |      |      |     |    |
|-------------------------------|------|------|------|-----|----|
|                               | 0    | 2    | 4    | 6   | 8  |
| Never user                    | 3380 | 2725 | 1615 | 664 | 66 |
| Former user                   | 2751 | 2241 | 1334 | 545 | 65 |
| Current (<20)                 | 1130 | 905  | 513  | 218 | 25 |
| Current (≥20)                 | 1063 | 894  | 546  | 233 | 23 |
